# Supplementary material for: Density-dependent resistance protects Legionella pneumophila from its own antimicrobial metabolite, HGA
Source: eLife journal article supplement (doi:10.7554/elife.46086), 2019-05-27
Supplement: supp [file elife-46086-supp-v1.zip]

**A**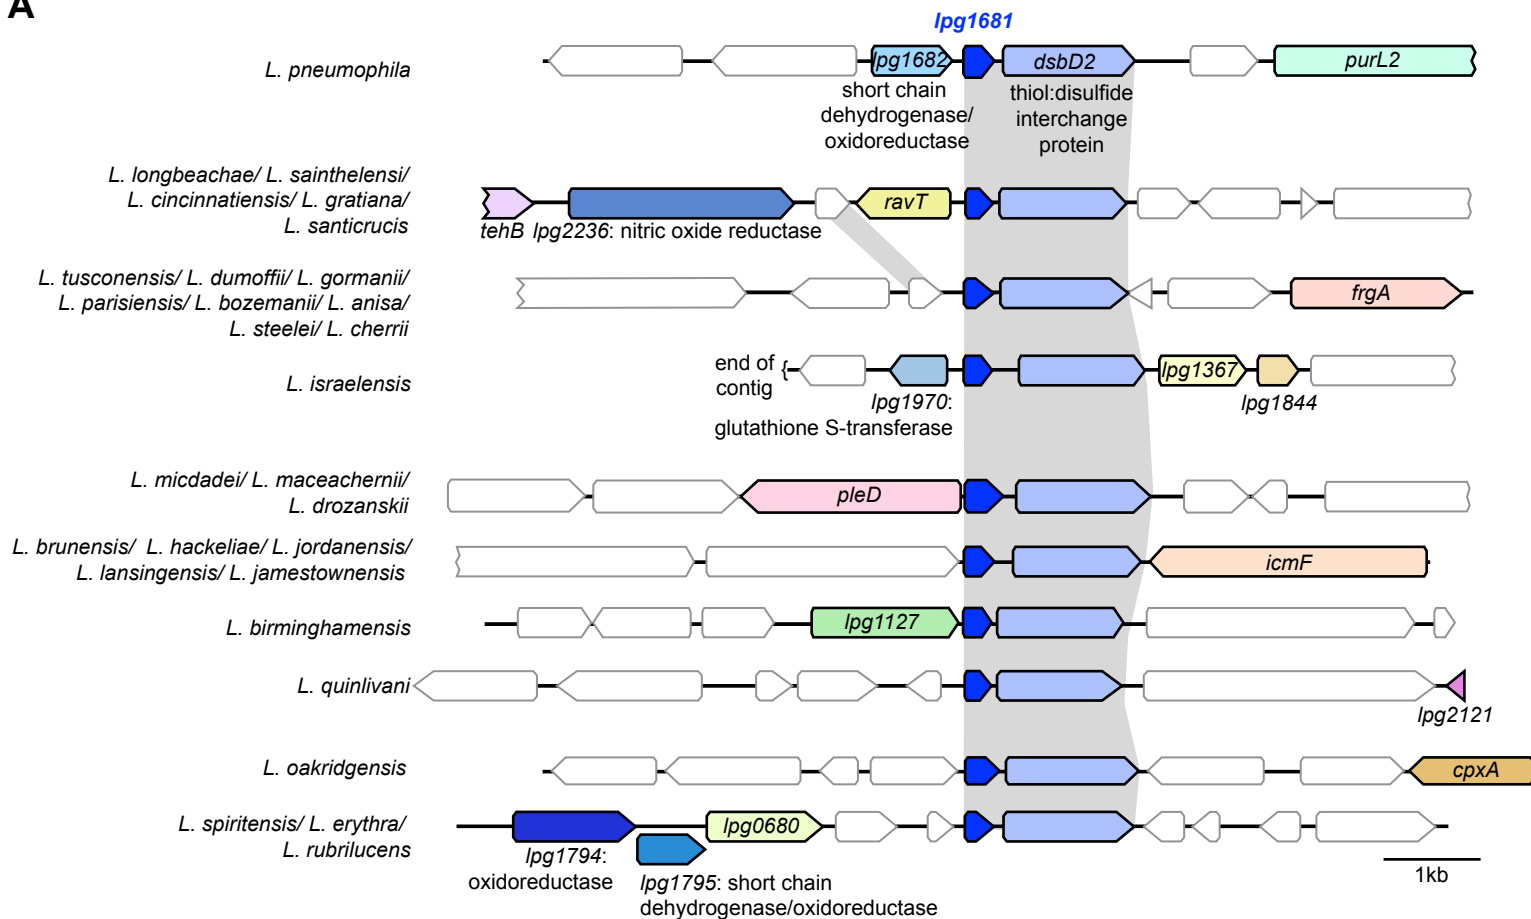**B**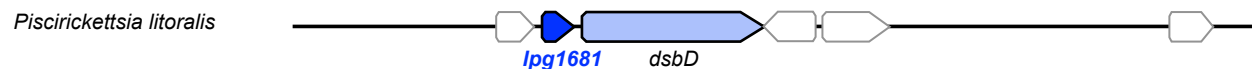

**Figure 5-figure supplement 2.** Evolution of genes in the *lpg1681* locus among **A)** *Legionella* species and **B)** the fish pathogen *Piscirickettsia*. In the species that carry hypothetical gene *lpg1681*, it always resides upstream of the thiol:disulfide interchange gene *dsbD2*, despite extensive turnover of neighboring genes. Species separated by a “/” have similar syntenic loci. Annotated genes are colored, with redox-related genes in shades of blue. Hypothetical genes are white. Gray shading indicates gene homology among the species.
