# Supplementary material for: Density-dependent resistance protects Legionella pneumophila from its own antimicrobial metabolite, HGA
Source: eLife journal article supplement (doi:10.7554/elife.46086), 2019-05-27
Supplement: supp [file elife-46086-supp-v1.zip]

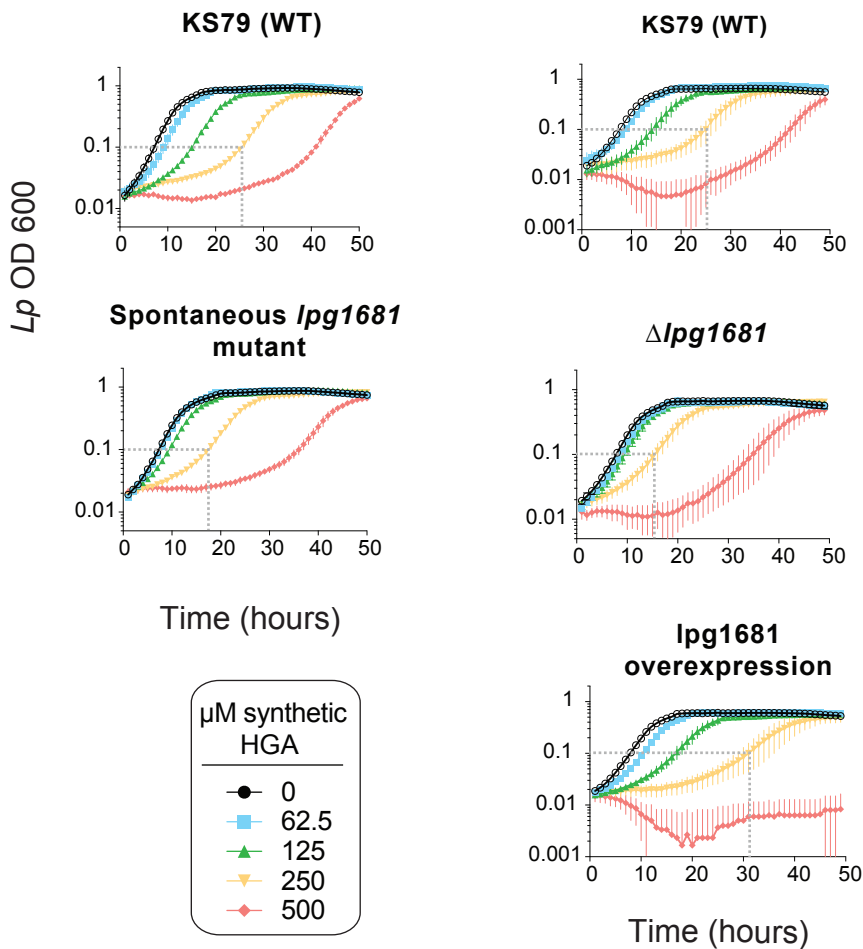

**Figure 5-figure supplement 1.** Growth curves of *lpg1681* *Lp* strains upon exposure to HGA. For each experiment, we provide a matched wild type (KS79) control for comparison. The spontaneous *lpg1681* mutant and the deletion mutant both had less severe growth delays from HGA than wild type. Conversely, the *lpg1681* overexpression strain was sensitized to HGA, with longer growth delays than wild type. Dashed gray line shows the time for the 250 $\mu\text{M}$  HGA condition to reach an OD of 0.1, to facilitate comparisons.
