# Supplementary material for: Density-dependent resistance protects Legionella pneumophila from its own antimicrobial metabolite, HGA
Source: eLife journal article supplement (doi:10.7554/elife.46086), 2019-05-27
Supplement: supp [file elife-46086-supp-v1.zip]

**A**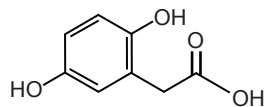

Homogentisic Acid

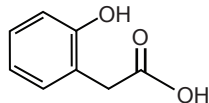

2-hydroxyphenylacetic acid

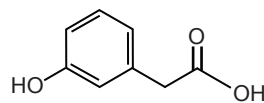

3-hydroxyphenylacetic acid

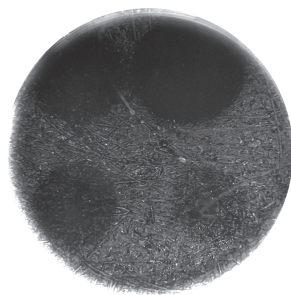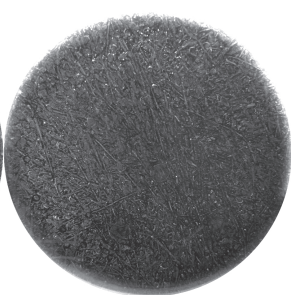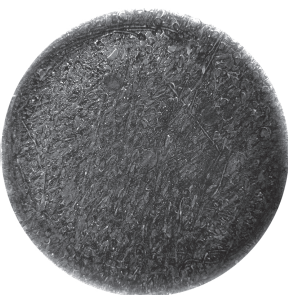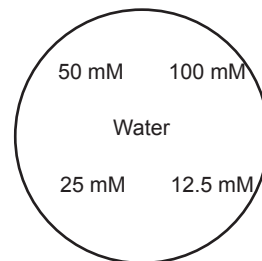**B**

HGA + catalase

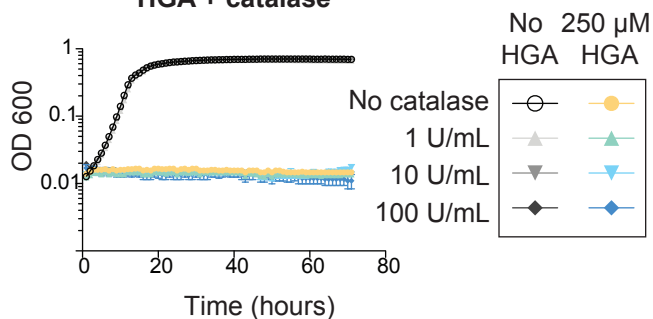**C**

H2O2 + catalase

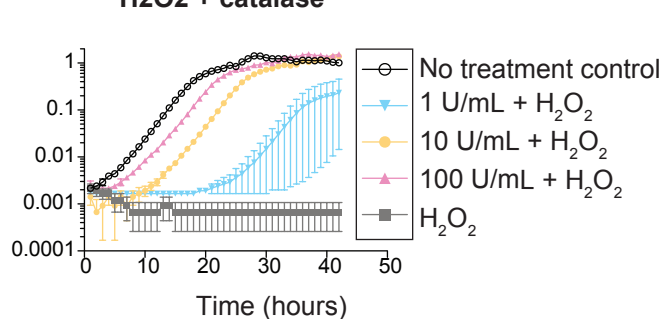**D**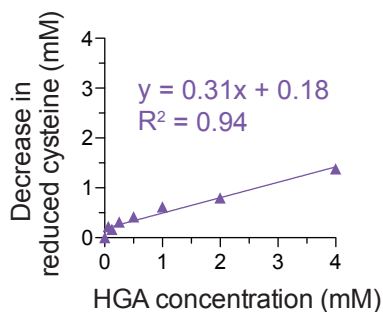**E**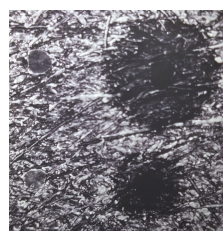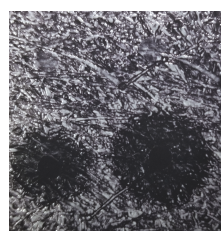

DTT    HGA

Water    DTT + HGA

R. Glut    Ox. Glut

R. Glut    Ox. Glut

+ HGA    + HGA

**Figure 3-figure supplement 1.** Impacts of chemical compounds on HGA-mediated inhibition of *Legionella*.

**A)** HGA inhibits *Lm* growth but HGA-related compounds do not. Chemical names and structures are shown above the corresponding plates. On each plate, different concentrations of each compound were spotted onto a lawn of *Lm* in 10  $\mu$ L droplets, arranged as indicated at the right. **B)** Addition of catalase does not rescue *Lm* susceptibility to 250  $\mu$ M HGA. **C)** Control experiment showing catalase is active, based on its ability to protect *Lp* from H<sub>2</sub>O<sub>2</sub>. **D)** Quantification of HGA's ability to oxidize cysteine. Data points are in purple, with a linear line of best fit. **E)** The potency of HGA is decreased when pre-incubated with reducing agents. 100 mM HGA was mixed with dithiothreitol (DTT), oxidized glutathione (Ox. Glut) or reduced glutathione (R. Glut) for 15 minutes prior to spotting 10  $\mu$ L onto a lawn of *Lm* and allowing to grow for 3 days. Key below each image indicates where each solution was added.
