# Supplementary material for: Density-dependent resistance protects Legionella pneumophila from its own antimicrobial metabolite, HGA
Source: eLife journal article supplement (doi:10.7554/elife.46086), 2019-05-27
Supplement: supp [file elife-46086-supp-v1.zip]

Archive with 9 entries (9 files):
- elife_poa_e46086_Figure_5_figure_supplement_2.pdf
- elife_poa_e46086_Figure_5_figure_supplement_1.pdf
- elife_poa_e46086_Figure_7_figure_supplement_1.pdf
- elife_poa_e46086_Transparent_Reporting_File.docx
- elife_poa_e46086_Figure_3_figure_supplement_1.pdf
- elife_poa_e46086_Supplementary_file_1.xlsx
- elife_poa_e46086_Figure_4_figure_supplement_1.pdf
- elife_poa_e46086_Figure_1_figure_supplement_1.pdf
- elife_poa_e46086_Figure_2_figure_supplement_1.pdf
