# Supplementary material for: Density-dependent resistance protects Legionella pneumophila from its own antimicrobial metabolite, HGA
Source: eLife journal article supplement (doi:10.7554/elife.46086), 2019-05-27
Supplement: supp [file elife-46086-supp-v1.zip › elife_poa_e46086_Supplementary_file_1.xlsx]

## Sheet: A) transposon mutants
Supplementary File 1A) Recovered transposon mutants of L. pneumophila with defects in L. micdadei inhibition
Protein Group and Locus of Insertion	Function or Product Name	Polar Effect Possible?	Upstream of Transport Gene?	Hits in the Same Operon	Pigment Production	Inhibition Phenotype
lpg1998	Histidinol-Phosphate Aminotransferase (hisC2)	Yes	No	2	None	No Zone
lpg2276	Glu/Leu/Phe/Val Dehydrogenase	Yes	No	3	None	No Zone
lpg2277	O-methyltransferase, SAM-Dependent	Yes	No	3	None	No Zone
lpg0501	Phosphoglyceromutase (pgm)	Yes	No	1	Yes	Small Zone
lpg0675	Hypothetical gene	No	No	1	Yes	Small Zone
lpg0710	Sepiapterin reductase (yueD)	Yes (hutI)	Yes	2	None	Small Zone
lpg0711	Hydrolase of 4-imidazolone-5-propionate (hutl)	Yes	Yes	2	Reduced	Small Zone
lpg1020	Chemiosmotic Efflux System B Protein A	No	Yes	1	Yes	Small Zone
lpg1291	2 component sensor kinase	Yes	No	1	Yes	Small Zone
lpg1439	Mg2+ and Co2+ Transporter (corC)	Yes	Yes	1	Yes	Small Zone
lpg1867	Phage Integrase	Yes	Yes	1	Yes	Small Zone
lpg1874	General secretion pathway protein L	Yes (yghD)	Yes	2	Yes	Small Zone
lpg1875	General secretion pathway protein M-type (yghD)	No	Yes	2	Yes	Small Zone
lpg2238/ lpg2239*	Hypothetical gene	Yes	Yes	1	Yes	Small Zone
lpg2248	Hypothetical gene	Yes	No	2	Yes	Small Zone
lpg2251	Hypothetical gene	Yes	No	2	Yes	Small Zone
lpg2269	Endonuclease	Yes	No	1	Yes	Small Zone
lpg2439	NADPH-dependent FMN reductase domain-containing protein	No	No	1	Yes	Small Zone
lpg2478/ lpg2477*	glycotransferase or high affinity nickel transporter	Yes	Yes	1	Yes	Small Zone
lpg2679	D-isomer specific 2-hydroxyacid dehydrogenase	Yes	No	1	Yes	Small Zone
lpg2799	O-acetyltransferase	No	No	1	Yes	Small Zone
lpg2872	dinucleoside phosphate hydrolase	Yes	No	1	Reduced	Small Zone
*The transposon insertions were mapped to a window that overlapped with both genes noted.

## Sheet: B) Strains and plasmids
Supplementary File 1B) Strains and plasmids used
Strains	Relevant Genotype	References
KS79	Wild-type Legionella pneumophila (Lp)	de Felipe et al, 2008
Tatlock	Wild-type Legionella micdadei (Lm)	Herbert et al., 1980
LG36	KS79 ∆bbcB	This work
LG51	hisC2::Tn insertion in KS79	This work
LG54	lpg2276::Tn in KS79	This work
LG79	lpg2277::Tn in KS79	This work
LG38	KS79 ∆hmgA	This work
LG102	KS79 ∆lpg1681	This work
LG107	KS79 ∆lqsR	This work
MB444	Lp02 rpoS pRpoS-pKB5	Bachman and Swanson, 2001
MB445	Lp02 rpoS pKB5	Bachman and Swanson, 2001
MB434	Lp02 letA pMMB	Hammer et al., 2002
MB435	Lp02 letA pLetA-pMMB	Hammer et al., 2002
MB697	Lp02 relA:gent/spoT:kan	Dalebroux et al., 2008
MB688	Lp02 relA:gent/spoT:kan/pspoT	Dalebroux et al., 2008
Plasmids	Description	References
pMMB207C	RSF1010 derivative, IncQ lacIq Cmr Ptac oriT ∆mobA	Chen et al., 2004
pLAW344	SacB MCS oriT(RK2) Cmr oriR(Co1E1) Apr loxP	Wiater et al., 1994
pTO100	Mariner himar-1 transposon R6K Kmr sacB Apr C9 transposase	O’Connor et al., 2011
pTL35	pLAW344:∆bbcB	This work
pTL36	pLAW344:∆hmgA	This work
pTL43	pMMB207c:hisC2	This work
pTL46	pMMB207c:Hpd	This work
pTL52	pLAW344:∆1681	This work
pTL53	pLAW344:∆LqsR	This work
pTL54	pMMB207c:lpg1681	This work

## Sheet: C) Primers
Supplementary File 1C) Primers used for cloning
Gene Deletion Primers	Sequence (5’ -> 3’)
bbcB P1	TCCACTAGTTCTAGAGCGGCCCCAGACAAGATAAGGCCACT
bbcB P2	AAAAACAGCATGGTTTTATTCCTCAATATAAAACACCTTAATTGCTATATGATGCTTT
bbcB P3	AAAGCATCATATAGCAATTAAGGTGTTTTATATTGAGGAATAAAACCATGCTGTTTTT
bbcB P4	GGAAGATACTTAACAGGGAAGTGAGAGTTCAGAAATGGAAGAAGGCAG
hmgA P1	TCCACTAGTTCTAGAGCGGCCAAGATGATGAAGAGCCAATTAAGGA
hmgA P2	CATCAAAAATCTTGAAGGAGATTGAACTATTGACTGCTTTTTAAGATGTAAAATTGAC
hmgA P3	GTCAATTTTACATCTTAAAAAGCAGTCAATAGTTCAATCTCCTTCAAGATTTTTGATG
hmgA P4	GGAAGATACTTAACAGGGAAGTGAGACTTAATTCCGTATCGTTTGATGTGCG
1681 P1	TCCACTAGTTCTAGAGCGGCCCCCAATCCCTGAGCCAAATAACC
1681 P2	CTGTACAGACCTCTCTTAAAAAGATACTATAGAGTAAATTTGTCAACTTTCTCAGTAGG
1681 P3	CCTACTGAGAAAGTTGACAAATTTACTCTATAGTATCTTTTTAAGAGAGGTCTGTACAG
1681 P4	GGAAGATACTTAACAGGGAAGTGAGAGGCAATTTCTCATCACCTTCAAG
LqsR P1	TCCACTAGTTCTAGAGCGGCCAACATCAGTCAACATCCGCAA
LqsR P2	ACTCCAAAAAGCCCGGTGAAAACTGTTCAAATGAGCCGCC
LqsR P3	GGCGGCTCATTTGAACAGTTTTCACCGGGCTTTTTGGAGT
LqsR P4	GGAAGATACTTAACAGGGAAGTGAGAGCACAGCGTGGGGAGATTAA
Complementation Primers
hpd Fwd	CAATTTCACACAGGAAACAGAATCCCCGGCAAGCAATACA
hpd Rev	TGCCTGCAGGTCGACTCTAGCTAGCTTAATTCTTTTAAAGTACCACGTCGAAC
hisC2 Fwd	GCTCGGTACCCGGGGATCCTATAAATTCATTCGTGACAGCTGGC
hisC2 Rev	TGCCTGCAGGTCGACTCTAGCGCCAATTCCCTCGCAAG
lpg1681 Fwd	CAATTTCACACAGGAAACAGGACCTCTCTTAAAAAGATACTATAGTTATTATG
lpg1681 Rev	TGCCTGCAGGTCGACTCTAGGCCTACTGAGAAAGTTGACAA
Arbitrary PCR Primers
pTO100_F	CTTCTATCGCCTTCTTGACGAGTT
pTO100_R	GTGCCACCTAAATTGTAAGCGTTA
pTO100_Rd2	TCTAGAGACCGGGGACTTATCA
arb1	GGCCACGCGTGCACTAGTACNNNNNNNNNNGATAT
arb2	GGCCACGCGTCGACTAGTAC
Underlined regions contain homology to the destination plasmids.
